# Supplementary material for: Mixing positive and negative valence: Affective-semantic integration of bivalent words
Source: PubMed Central journal article supplement (PMC4974501; doi:10.1038/srep30718), 2016-08-05
Supplement: srep30718-s1.pdf [file srep30718-s1.pdf]

**Mixing positive and negative valence:  
Affective-semantic integration of bivalent words**

Michael Kuhlmann <sup>a\*</sup>, Markus J. Hofmann <sup>b</sup>, Benny B. Briesemeister <sup>c</sup>,  
Arthur M. Jacobs <sup>a, d, e</sup>

<sup>a</sup> Department of Education and Psychology, Free University Berlin, Habelschwerdter Allee 45, 14195 Berlin, Germany, michael.kuhlmann@fu-berlin.de (corresponding author)

<sup>b</sup> Department of Psychology, University Wuppertal, Max-Horkheimer-Str. 20 42119 Wuppertal, Germany, mhofmann@uni-wuppertal.de

<sup>c</sup> Center for Applied Neuroscience, Free University Berlin, Habelschwerdter Allee 45, 14195 Berlin, Germany, benny.briesemeister@fu-berlin.de

<sup>d</sup> Dahlem Institute for Neuroimaging of Emotion (D.I.N.E.), Free University Berlin, Habelschwerdter Allee 45, 14195 Berlin, Germany, ajacobs@zedat.fu-berlin.de

<sup>e</sup> Center for Cognitive Neuroscience (CCNB), Free University Berlin, Habelschwerdter Allee 45, 14195 Berlin, Germany, ajacobs@zedat.fu-berlin.de

Table S1: List of Items

| Positive-Positive | Negative-Negative | Positive-Negative | Negative-Positive |
|-------------------|-------------------|-------------------|-------------------|
| Aussichtstoleranz | Abszessschock     | Anmutfeigling     | Absagearoma       |
| Duschvenus        | Ärgerhenker       | Anrufinzest       | Abschaumknospe    |
| Einfallvorsorge   | Arrestschuft      | Aromaunwesen      | Abstiegsgarten    |
| Einklangsschlaf   | Blödheitskargheit | Ausflugunrecht    | Armutswunsch      |
| Erholungsjubel    | Bombenmutation    | Bildungsgalgen    | Bomberumsicht     |
| Erotikengel       | Bunkersadismus    | Diplomübelkeit    | Choleravilla      |
| Fantasiediplom    | Einsturzmakel     | Ekstasetrübsinn   | Drecksausdauer    |
| Freiheitsgenie    | Geißelsintflut    | Friedekerker      | Feiglingsgeschenk |
| Gartenaussicht    | Killerpickel      | Frühlingszweifel  | Fluchjugend       |
| Genusseinfall     | Kummernotfall     | Helferschleim     | Furchtfrühling    |
| Geschenktugend    | Lepraelend        | Jugendfreitod     | Gesindeltulpe     |
| Gewinningenießer  | Lügnertorpedo     | Karrierepeiniger  | Grippeklugheit    |
| Heilungsquelle    | Makelabstieg      | Kissenlepra       | Halunkenekstase   |
| Hobbyhoffnung     | Milizseuche       | Kontaktmeineid    | Henkerhelfer      |
| Hoffnungsnatur    | Monstrumverfall   | Konzertpranger    | Ignoranzkakao     |
| Klugheitsumarmung | Neurosearmut      | Massagesaboteur   | Jaucheheimat      |
| Künstlerliebreiz  | Pickelhorror      | Medaillenbiest    | Knastluxus        |
| Lorbeererotik     | Plagenmoder       | Medizinkomplott   | Konfliktoptimist  |
| Orgasmusheilung   | Prellungsallergie | Naturmonstrum     | Marschtraube      |
| Partnerretter     | Prügelzerrung     | Optimistkonflikt  | Marterpurpur      |
| Purpurflirt       | Racheverlust      | Romanzenabschied  | Migränehobby      |
| Respektklarheit   | Saboteurfluch     | Scherzfürer       | Mottenkonzert     |
| Rettungsbargeld   | Schockrechnung    | Sesselgeißel      | Prangerkamin      |
| Rubinküken        | Sintflutmigräne   | Siestavorwurf     | Rechnungsmelodie  |
| Saphirseide       | Übelkeitsleichnam | Sprachenzerfall   | Schlägersieger    |
| Schutzsiesta      | Unfriedebastard   | Toleranzfieber    | Torpedobalkon     |
| Siegersprache     | Verfallskummer    | Tugendrheuma      | Verrätertriumph   |
| Trefferbonbon     | Verlustgesindel   | Welpenkollaps     | Verratsvorspiel   |
| Vorspielmedizin   | Vorwurfsgrippe    | Willebombe        | Zerrungsrespekt   |
| Waffelanmut       | Zerfallstrennung  | Wonedreck         | Zweifellorbeer    |
